# Supplementary material for: An accurate aging clock developed from large-scale gut microbiome and human gene expression data
Source: PubMed Central journal article supplement — iScience. 2023 Dec 2;27(1):108538. doi: 10.1016/j.isci.2023.108538 (PMC10790003; doi:10.1016/j.isci.2023.108538), 2023-12-02
Supplement: mmc2.pdf [file mmc2.pdf]

# STAR methods tables

| <b>Methods S1. Definition of terms, related to Table 1, Figure 1(b), and Figure 1(c)</b> |                                                                                                                                                                                                                                     |
|------------------------------------------------------------------------------------------|-------------------------------------------------------------------------------------------------------------------------------------------------------------------------------------------------------------------------------------|
| <b>Richness</b>                                                                          | The count of species or KOs detected in a sample                                                                                                                                                                                    |
| <b>Mean absolute error</b>                                                               | $\frac{\sum_{i=1}^n  y_i - x_i }{n}$                                                                                                                                                                                                |
| $R^2$                                                                                    | <p>The proportion of the variance in the dependent variable that is predictable from the independent variables.</p> $1 - \frac{RSS}{TSS}$ <p>Where RSS is the sum of squares of residuals, and TSS is the total sum of squares.</p> |
| <b>Shannon's diversity</b>                                                               | $-\sum_{i=1}^R p_i \ln(p_i)$ <p>Where <math>p_i</math> is the empirical probability of detecting species <math>i</math> in the dataset.</p>                                                                                         |
| <b>Pielou's Evenness index</b>                                                           | $\frac{H}{H_{Max}}$ <p>Where H is shannon diversity and <math>H_{MAX}</math> is the maximum possible achievable shannon entropy.</p>                                                                                                |

| <b>Methods S2 related to Table 1, Figure 1(b), and Figure 1(c)</b>                  |                                                                                                                                                                                                                                                                                                                                                                                                                                                                                 |                                                                                                                                                                                                                                                                                                                                                                                                                                                                     |
|-------------------------------------------------------------------------------------|---------------------------------------------------------------------------------------------------------------------------------------------------------------------------------------------------------------------------------------------------------------------------------------------------------------------------------------------------------------------------------------------------------------------------------------------------------------------------------|---------------------------------------------------------------------------------------------------------------------------------------------------------------------------------------------------------------------------------------------------------------------------------------------------------------------------------------------------------------------------------------------------------------------------------------------------------------------|
| <b>Library</b>                                                                      | <b>Relevant functions/modules</b>                                                                                                                                                                                                                                                                                                                                                                                                                                               | <b>Description</b>                                                                                                                                                                                                                                                                                                                                                                                                                                                  |
| <a href="https://scikit-learn.org/">https://scikit-learn.org/</a><br>Version 0.22.0 | <ol style="list-style-type: none"> <li>1. sklearn.linear_model.ElasticNet</li> <li>2. sklearn.model_selection.GridSearchCV</li> <li>3. sklearn.preprocessing.PowerTransformer</li> <li>4. sklearn.pipeline.Pipeline</li> <li>5. sklearn.metrics.r2_score</li> <li>6. sklearn.metrics.mean_absolute_error</li> <li>7. sklearn.metrics.train_test_split</li> <li>8. sklearn.model_selection.RepeatedStratifiedKfold</li> <li>9. sklearn.ensemble.RandomForestRegressor</li> </ol> | <ol style="list-style-type: none"> <li>1. Elastic net implementation</li> <li>2. Used for hyperparameter optimization</li> <li>3. Power transformation implementation</li> <li>4. Utility to chain commands that need to be applied during training</li> <li>5. Coefficient of determination</li> <li>6. MAE</li> <li>7. Used to create train/test/validation data</li> <li>8. Used for nested cross validation</li> <li>9. Random forest implementation</li> </ol> |
| <a href="http://scikit-bio.org/">http://scikit-bio.org/</a><br>Version 0.5.6        | <ol style="list-style-type: none"> <li>1. skbio.stats.composition.multiplicative_replacement</li> <li>2. skbio.stats.composition.clr</li> </ol>                                                                                                                                                                                                                                                                                                                                 | <ol style="list-style-type: none"> <li>1. Implementation of imputation using multiplicative replacement</li> <li>2. CLR transformation implementation</li> </ol>                                                                                                                                                                                                                                                                                                    |
| Xgboost<br>Version 1.0.2                                                            | <ol style="list-style-type: none"> <li>1. XGBRegressor</li> </ol>                                                                                                                                                                                                                                                                                                                                                                                                               | <ol style="list-style-type: none"> <li>1. Gradient boosting machine implementation</li> </ol>                                                                                                                                                                                                                                                                                                                                                                       |
| PyTorch<br>Version 1.1.0                                                            | <ol style="list-style-type: none"> <li>1. torch.utils.data: DataLoader, TensorDataset</li> <li>2. torch.autograd.Variable</li> <li>3. 3. torch.optim.*</li> <li>4. 4. torch.nn.functional</li> <li>5. 5. torch.nn</li> </ol>                                                                                                                                                                                                                                                    | <ol style="list-style-type: none"> <li>1. Dataset utilities</li> <li>2. Autodiff utilities</li> <li>3. Optimization</li> <li>4. Functional neural net API</li> <li>5. Neural network functions</li> </ol>                                                                                                                                                                                                                                                           |

| <b>Methods S3 related to Table 1, Figure 1(b), and Figure 1(c)</b> |                                                                                                                                                                                                                                                                      |                                            |
|--------------------------------------------------------------------|----------------------------------------------------------------------------------------------------------------------------------------------------------------------------------------------------------------------------------------------------------------------|--------------------------------------------|
| <b>Model class</b>                                                 | <b>Hyperparameter Space</b>                                                                                                                                                                                                                                          | <b>Model selection method</b>              |
| Neural net                                                         | 1 and 2 hidden layer NNs<br>varying hidden dimension from 50 to 1500.                                                                                                                                                                                                | Grid search using held out validation set. |
| Random forest                                                      | n_estimators = [50, 100, 200, 300, 500]<br>max_depth = [10, 20, 30, 40, 50, 60, 70, 80, 90, 100, None]<br>min_samples_split = [2, 5, 10]<br>min_samples_leaf = [1, 2, 4]                                                                                             | Random search + CV                         |
| Gradient machine boosting                                          | learning_rate = [0.05, 0.10, 0.15, 0.20, 0.25, 0.30] ,<br>max_depth = [ 3, 4, 5, 6, 8, 10, 12, 15]<br>min_child_weight=[ 1, 3,5,7],<br>gamma = [ 0.0, 0.1, 0.2, 0.3, 0.4]<br>colsample_bytree = [0.3, 0.4, 0.5, 0.7 ]<br>n_estimators =[50, 100, 200, 300, 500, 600] | Random search +CV                          |

| <b>Methods S4 related to Table 1, Figure 1(b), and Figure 1(c)</b> |                     |                                                                                                     |
|--------------------------------------------------------------------|---------------------|-----------------------------------------------------------------------------------------------------|
| <b>Model class</b>                                                 | <b>Feature type</b> | <b>Selected model</b>                                                                               |
| Neural net                                                         | Blood               | 2 hidden layers, hidden dim =1000                                                                   |
|                                                                    | Stool               | 1 hidden layer, hidden dim=500                                                                      |
| Random forest                                                      | Blood               | n_estimators = 200<br>max_depth = None<br>min_samples_split = 10<br>min_samples_leaf = 2            |
|                                                                    | Stool               | n_estimators = 100<br>max_depth = 5<br>min_samples_split = 2<br>min_samples_leaf = 1                |
| Gradient boosting machine                                          | Blood               | max_depth = 5<br>min_child_weight= 1<br>gamma =0.3<br>colsample_bytree = 0.5<br>n_estimators = 500  |
|                                                                    | Stool               | max_depth = 4<br>min_child_weight= 5<br>gamma = 0.0<br>colsample_bytree = 0.3<br>n_estimators = 500 |
